# Supplementary material
Source: publisher figshare collection journal article supplement (https://acs.figshare.com/ndownloader/files/5176831)
Supplement: Supplementary file 1 [file 5176831]

## Supporting Information

### **H<sub>2</sub> Activation in Aqueous Solution: Formation of *trans*-[Fe(DMeOPrPE)<sub>2</sub>H(H<sub>2</sub>)]<sup>+</sup> via the Heterolysis of H<sub>2</sub> in Water**

**John D. Gilbertson, Nathaniel K. Szymczak, and David R. Tyler\***

Department of Chemistry, University of Oregon, Eugene, Oregon 97403

#### **Table of contents**

Experimental procedures S1

References S3

Figure S1. <sup>31</sup>P{<sup>1</sup>H} NMR spectra of DMeOPrPEH<sup>+</sup>

Figure S2. <sup>31</sup>P{<sup>1</sup>H} NMR spectra of DMeOPrPEH<sub>2</sub><sup>+</sup>

Figure S3. <sup>31</sup>P{<sup>1</sup>H} NMR spectrum (233K) of the title complex

Figure S4. <sup>1</sup>H NMR spectrum of the title complex with Proton Sponge

Figure S5. <sup>1</sup>H NMR spectrum (hydride region) of the title complex

**Materials and Reagents.** Unless otherwise noted, all manipulations were carried out in an argon-filled Vacuum Atmospheres Co. glove box or on a Schlenk line using argon or nitrogen. The 1,2-bis(methoxypropyl)phosphinoethane and *trans*-Fe(DMeOPrPE)<sub>2</sub>Cl<sub>2</sub><sup>10</sup> were prepared as reported previously. Reagent grade ethanol, nitromethane, and sodium tetrahydroborate were obtained from Aldrich. The nitromethane was distilled from CaCl<sub>2</sub> and ethanol was distilled from Mg turnings. These solvents were deoxygenated with either three freeze-pump thaw cycles or an argon purge before being brought into the glove box. Water was purified to a resistivity of 17-18 MΩ-cm with a Barnstead Ultrapure system and deoxygenated with an argon purge before use. Solutions of 0.2M HClO<sub>4</sub> in nitromethane (made by dilution of 8.4 ml reagent grade 70% HClO<sub>4</sub> (Baker) with 500 ml nitromethane) were degassed with an argon purge before being brought into the glovebox.

**Instrumentation and Procedures.** <sup>31</sup>P{<sup>1</sup>H} NMR and <sup>1</sup>H NMR were run on either a Varian Unity/Inova 300 spectrometer at an operating frequency of 299.94 (<sup>1</sup>H) and 121.42 (<sup>31</sup>P) MHz or a Varian Unity/Inova 500 spectrometer at an operating frequency of 500.62 (<sup>1</sup>H) and 202.45 (<sup>31</sup>P) MHz. The <sup>1</sup>H NMR and <sup>31</sup>P{<sup>1</sup>H} NMR were referenced to the solvent peak and to an external standard of 1% H<sub>3</sub>PO<sub>4</sub> in D<sub>2</sub>O, respectively. When required, the samples were sealed under argon in 7mm tubes fitted with Teflon valves. Samples that were run under pressure were sealed in high-pressure tubes and sealed with a Teflon valve. pH and mV measurements were performed with an Orion model 230 A pH meter equipped with a glass electrode and a Ag/AgCl reference electrode.

**Generation of *trans*-[Fe(DMeOPrPE)<sub>2</sub>H(H<sub>2</sub>)]Cl.** *trans*-Fe(DMeOPrPE)<sub>2</sub>Cl<sub>2</sub> (0.100g, 0.112mmol) was dissolved in 5 mL deionized water in a sealed Fischer-Porter tube, producing a deep purple solution. The resultant solution was immediately charged with 1-2 atm H<sub>2</sub> stirred and at ambient temperature. The solution changed color from deep purple to transparent yellow over a period of twenty minutes, but was allowed to stir overnight to ensure completion of the reaction. <sup>31</sup>P{<sup>1</sup>H} NMR spectrum of the reaction mixture showed a major resonance at δ 88.9(s). <sup>1</sup>H NMR (ethanol-*d*<sub>6</sub>/D<sub>2</sub>O; 60:40 wt%) of the hydride region at -40°C showed resonances at δ -10.9 (s, br) and δ -15.1 (quintet, <sup>2</sup>J<sub>P-H</sub> = 45 Hz).

**Generation of *trans*-[Fe(DMeOPrPE)<sub>2</sub>H(HD)]Cl.** To an NMR tube containing *ca.* 10 mg (0.001 mmol) *trans*-Fe(DMeOPrPE)<sub>2</sub>Cl<sub>2</sub> with an excess of NaBH<sub>4</sub> was added 0.5 mL CD<sub>3</sub>CD<sub>2</sub>OD. The addition was accompanied by gas evolution (HD) and a color change from green/brown to yellow. After two hours a <sup>1</sup>H NMR spectrum (-40°C) was obtained revealing a 1:1:1 triplet at δ -10.9 (<sup>1</sup>J<sub>HD</sub> = 29.8 HZ).

**Determination of pK<sub>a</sub>'s of DMeOPrPE.** In a typical experiment, the method of Allman and Goel<sup>38</sup> was employed. A millimole of material was dissolved in 25 mL of nitromethane and titrated with 0.2 M perchloric acid solution. Three separate titrations were performed on both a reference material (PPh<sub>3</sub>), and DMeOPrPE. The endpoints were determined from derivative plots and the half neutralization potentials (HNPs) were recorded. Aqueous pK<sub>a</sub> values were determined algebraically within ± 0.2 pK<sub>a</sub> units using the formula of Streuli<sup>39</sup> and the value of HNP for PPh<sub>3</sub> as a reference.

**Generation of DMeOPrPEH<sup>+</sup>.** DMeOPrPE (0.050g, 0.131 mmol) was dissolved in 10 mL of CH<sub>2</sub>Cl<sub>2</sub>. The resultant solution was treated with 1 equivalent (1.31mL of a 0.1M solution) of triflic acid in CH<sub>2</sub>Cl<sub>2</sub>. <sup>31</sup>P{<sup>1</sup>H}NMR spectra of the resultant solution showed resonances at δ 19.5 (d, <sup>3</sup>J<sub>P-P</sub> 35Hz) and -23.5 (d, <sup>3</sup>J<sub>P-P</sub> 35Hz), as well as a minor resonance for the free ligand, DMeOPrPE, at δ -26.7 (s). <sup>1</sup>H coupled <sup>31</sup>P NMR of the resultant solution revealed that the resonance at δ 19.5 split further into a doublet of 448 Hz (<sup>1</sup>J<sub>P-H</sub>) while the other two resonances were unaffected (Figure S1).

**Generation of DMeOPrPEH<sub>2</sub><sup>2+</sup>.** DMeOPrPE (0.050g, 0.131 mmol) was dissolved in 10 mL of CH<sub>2</sub>Cl<sub>2</sub>. The resultant solution was treated with an excess (4mL of a 0.1M solution) of triflic acid in CH<sub>2</sub>Cl<sub>2</sub>. <sup>31</sup>P{<sup>1</sup>H}NMR spectra of the resultant solution showed one resonance at δ 20.5 (s). <sup>1</sup>H coupled <sup>31</sup>P NMR of the resultant solution revealed that the resonance at δ 20.5 split into a doublet of 513 Hz (<sup>1</sup>J<sub>P-H</sub>) (Figure S2). This complex has been generated before by Herbkowski<sup>40</sup> and essentially identical spectra were obtained in our work.

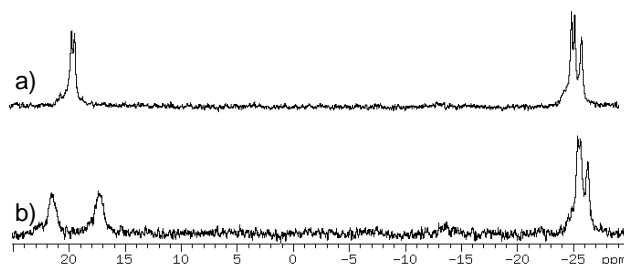

**Figure S1.**  $^{31}\text{P}\{^1\text{H}\}$  NMR spectra (RT): (a) reaction mixture of DMeOPrPE treated with approximately one equivalent triflic acid in  $\text{CH}_2\text{Cl}_2$ ; (b) same sample with  $^1\text{H}$  decoupler off.

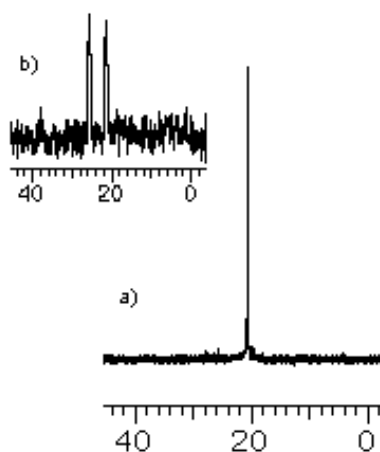

**Figure S2.**  $^{31}\text{P}\{^1\text{H}\}$  NMR spectra (RT): (a) reaction mixture of DMeOPrPE treated with an excess of triflic acid in  $\text{CH}_2\text{Cl}_2$ ; (b) same sample with  $^1\text{H}$  decoupler turned off.

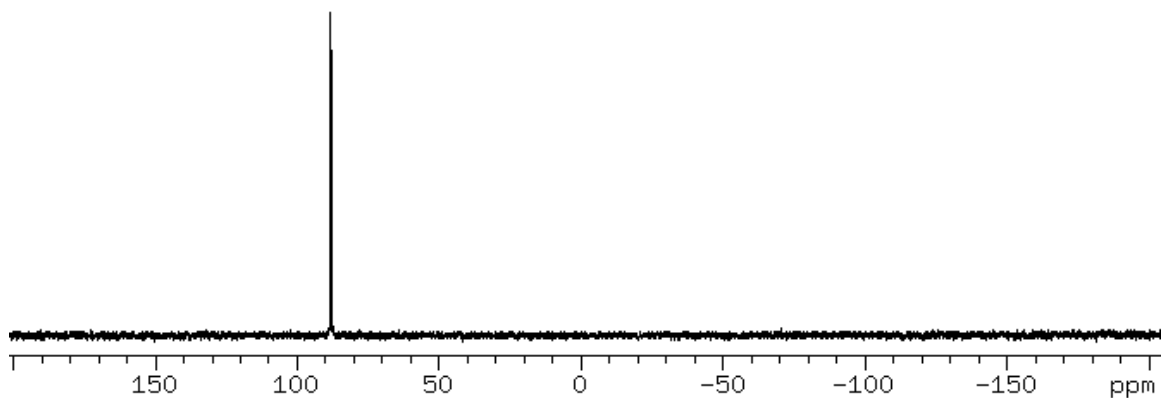

**Figure S3.**  $^{31}\text{P}\{^1\text{H}\}$  NMR spectra (233K): reaction mixture of **I** with  $\text{H}_2$  (1-2 atm) in ethanol- $d_6/\text{D}_2\text{O}$  (60/40 wt%) in the presence of one equivalent Proton Sponge

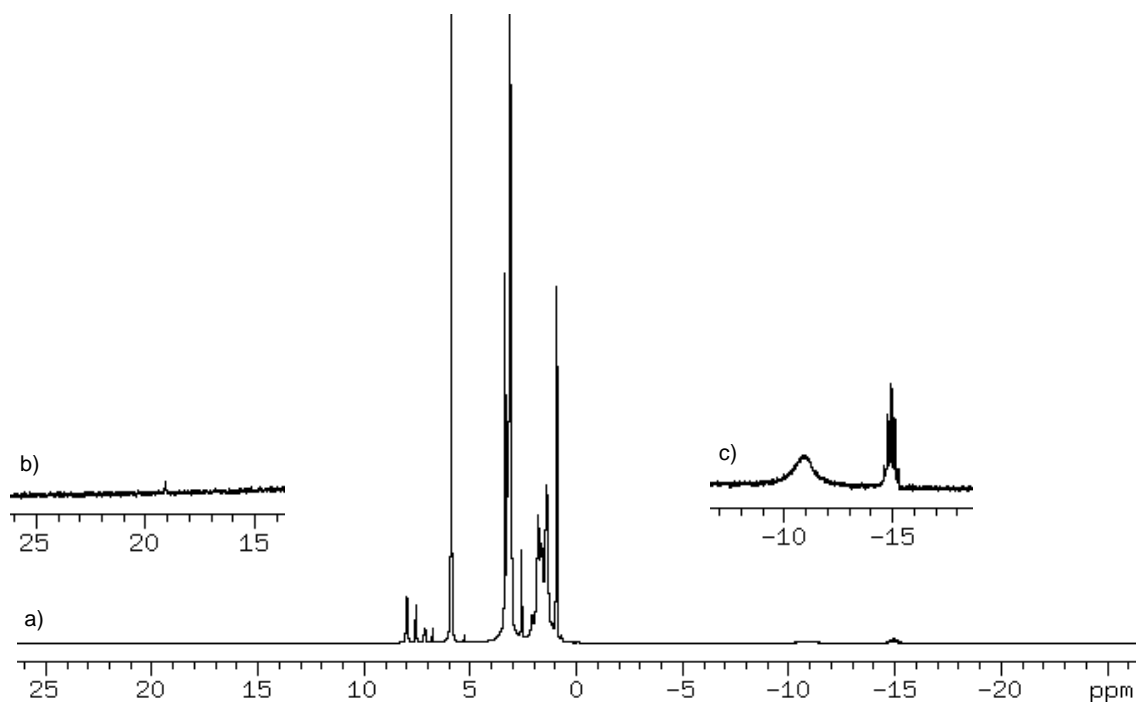

**Figure S4.** 500MHz <sup>1</sup>H NMR spectra (233K): (a) reaction mixture of **I** with H<sub>2</sub> (1-2 atm) in ethanol-*d*<sub>6</sub>/D<sub>2</sub>O (60/40 wt%) in the presence of one equivalent Proton Sponge; (b) expanded NHN<sup>+</sup> region of same sample; (c) expanded hydride region of same sample.

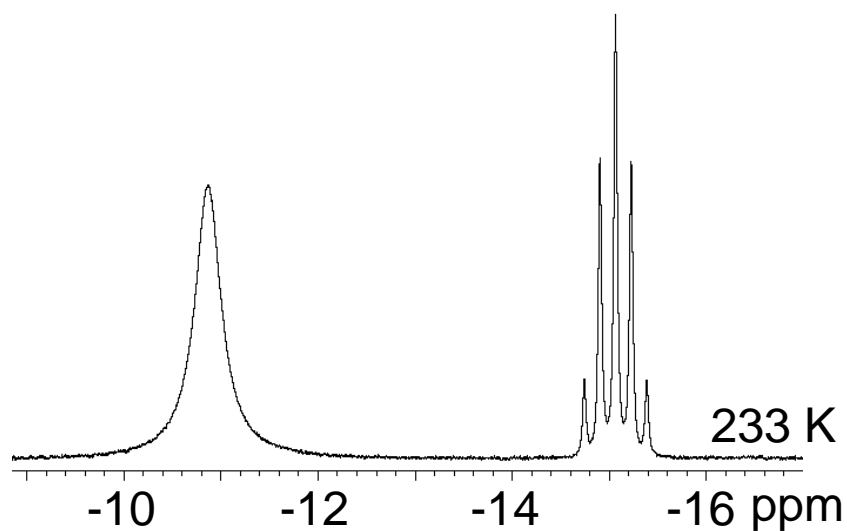

**Figure S5.** 500MHz <sup>1</sup>H NMR spectra (233K) of the hydride region of reaction mixture of **I** with H<sub>2</sub> (1-2 atm) in ethanol-*d*<sub>6</sub>/D<sub>2</sub>O (60/40 wt%)

#### Additional References

- (38) Allman, T.; Goel, R. G. *Can. J. Chem.* **1982**, *60*, 716.
- (39) Streuli, C.A. *Anal. Chem.* **1959**, *31*, 1652.
- (40) Herbowski, A.; Deutsch, E.A. *J. Organomet. Chem.* **1993**, *460*, 19.
